# Supplementary material for: Influence of CH4–Ar ratios on the composition, microstructure and optical properties of Be2C films synthesized by DC reactive magnetron sputtering
Source: Royal Society of Chemistry journal article supplement (doi:10.1039/c6ra02141g), 2016-01-01
Supplement: c6ra02141g1.pdf [file c6ra02141g1.pdf]

## Supplementary Data

### Influence of CH<sub>4</sub>-Ar ratios on composition, microstructure and optical properties of Be<sub>2</sub>C films synthesized by DC reactive magnetron sputtering

Yudan He,<sup>a</sup> Jiangshan Luo,<sup>a</sup> Kai Li,<sup>a</sup> Bingchi Luo,<sup>ab</sup> Jiqiang Zhang,<sup>a</sup> Hongbu Yin<sup>a</sup> and Weidong Wu<sup>ac\*</sup>

a. Research Center of Laser Fusion, China Academy of Engineering Physics, Mian-yang, 621900, China.

b. Science and Technology on Plasma Physics Laboratory, Mianyang 621900, China.

c. IFSA Collaborative Innovation Center, Shanghai Jiao Tong University, Shanghai 200240, China.

\*. E-mail: wuweidongding@163.com; Tel: +86 0816 2480903.

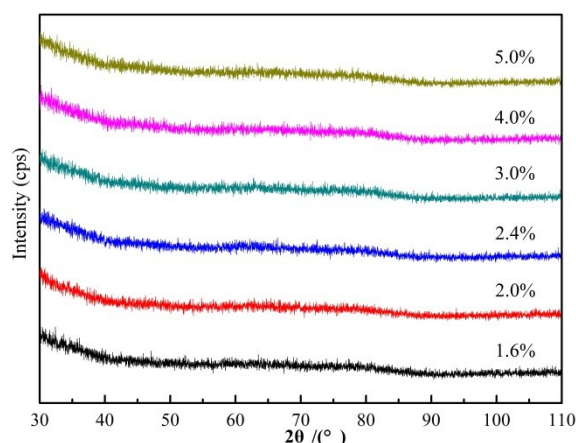

Supplementary Data Fig. S1 | XRD patterns of as-deposited Be<sub>2</sub>C films prepared at various CH<sub>4</sub>-Ar ratios.

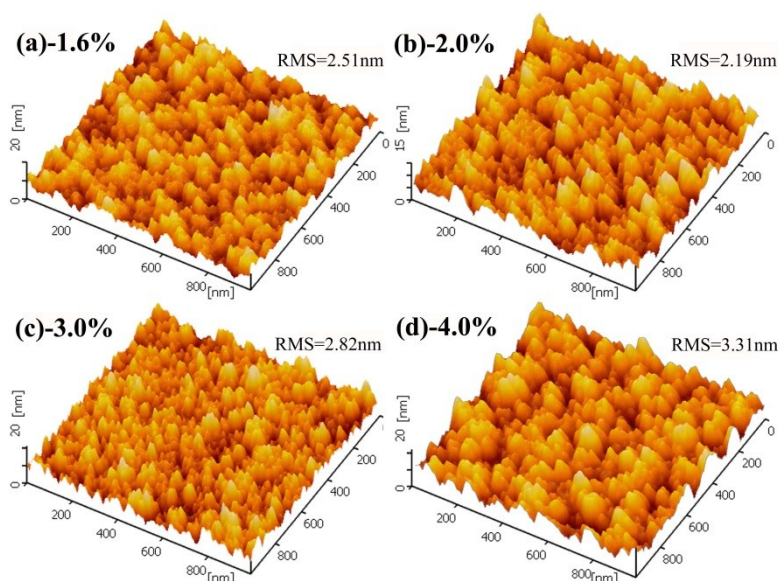

Supplementary Data Fig.S2 | Surface morphologies (AFM 3-dimension images) of the Be<sub>2</sub>C films deposited at (a) 1.6%, (b) 2.0%, (c) 3.0% and (d) 4.0% CH<sub>4</sub>-Ar ratios and their corresponding RMS

roughness.
